# Supplementary material
Source: HighWire-hosted journal article supplement (https://dmd.aspetjournals.org/highwire/filestream/66682/field_highwire_adjunct_files/0/Supplemental_70243.pdf)
Supplement: Supplemental_70243.pdf [file Supplemental_70243.pdf]

## **Supplemental Data**

### **Methylation of CAR is involved in the Suppression of CYP2C19 in HBV-associated Hepatocellular Carcinoma**

Xiaojing Tang, Lele Ge, Zhongjian Chen, Sisi Kong, Wenhui Liu, Yingchun Xu, Su Zeng, Shuqing Chen

## **Drug Metabolism and Disposition**

**Supplemental Table 1.** Information of primary hepatocytes

| Donor No. | Viability and yield                                                           | Plateability and confluence                             | Characterization result |                                |                                     | Donor demographics                                 |                           |                                                  |
|-----------|-------------------------------------------------------------------------------|---------------------------------------------------------|-------------------------|--------------------------------|-------------------------------------|----------------------------------------------------|---------------------------|--------------------------------------------------|
|           |                                                                               |                                                         | Enzyme                  | Assay<br>(rate of formation)   | Results<br>(pmol/min/million cells) | Physical                                           | Serology                  | Medical/social history                           |
| TLY       | 91% post-thaw viability by trypan blue exclusion<br>7.35 million viable cells | 0.336 OD MTT value and 99% confluent monolayer at day 5 | CYP2C8                  | desethylamodiaquine            | 135                                 | Age: 2 months<br>Gender: Female<br>Race: Caucasian | HBV: -<br>HCV:-<br>HIV: - | No medical history; no ETOH use; no tobacco use. |
|           |                                                                               |                                                         | CYP2C9                  | 4'-methylhydroxytolbutamide    | 185                                 |                                                    |                           |                                                  |
|           |                                                                               |                                                         | CYP2C19                 | 4'-hydroxymephenytoin          | 13.9                                |                                                    |                           |                                                  |
|           |                                                                               |                                                         | CYP1A2                  | acetaminophen                  | 3.05                                |                                                    |                           |                                                  |
|           |                                                                               |                                                         | CYP3A4                  | 6 $\beta$ -hydroxytestosterone | 73.9                                |                                                    |                           |                                                  |
| FLO       | 93% post-thaw viability by trypan blue exclusion<br>7.95 million viable cells | 0.304 OD MTT value and 95% confluent monolayer at day 5 | CYP2C9                  | 4'-methylhydroxytolbutamide    | 42.7                                | Age: 14 months<br>Gender: Male<br>Race: Hispanic   | HBV: -<br>HCV:-<br>HIV: - | No medical history; no ETOH use; no tobacco use. |
|           |                                                                               |                                                         | CYP2C19                 | 4'-hydroxymephenytoin          | 27.9                                |                                                    |                           |                                                  |
|           |                                                                               |                                                         | CYP1A2                  | acetaminophen                  | 28.9                                |                                                    |                           |                                                  |
|           |                                                                               |                                                         | CYP3A4                  | 6 $\beta$ -hydroxytestosterone | 41.6                                |                                                    |                           |                                                  |

**Supplemental Table 2. Information of liver species**

| Patient No. | Gender | Age | diagnosis                                             | HBV infection                                   |
|-------------|--------|-----|-------------------------------------------------------|-------------------------------------------------|
| 246139      | male   | 70  | Hepatocellular carcinoma                              | HBsAg+ HBcAb+                                   |
| 246355      | male   | 42  | Hepatocellular carcinoma                              | Chronic Hepatitis B history HBsAg+ HBcAb+       |
| 246564      | male   | 74  | Hepatocellular carcinoma                              | HBsAg+ HBcAb+ HBeAb+                            |
| 247172      | male   | 46  | Hepatocellular carcinoma                              | HBV DNA 20700000 copies/ml HBsAg+ HBcAb+ HBeAb+ |
| 234747      | female | 44  | Hepatocellular carcinoma                              | HBV DNA 2230 copies/ml HBsAg+ HBcAb+ HBeAb+     |
| 247942      | male   | 45  | Hepatocellular carcinoma                              | HBV DNA 3980 copies/ml HBsAg+ HBcAb+ HBeAb+     |
| 239307      | female | 64  | Hepatocellular carcinoma                              | HBV DNA 160000 copies/ml                        |
| 241641      | female | 32  | Hepatocellular carcinoma                              | Chronic Hepatitis B history HBsAg+ HBcAb+       |
| 249299      | female | 50  | Hepatocellular carcinoma                              | HBsAg+ HBcAb+ HBeAb+                            |
| 245853      | male   | 57  | Hepatocellular carcinoma                              | HBV DNA<1000 copies/ml HBsAg+ HBcAb+ HBeAb+     |
| 255732      | male   | 49  | Hepatocellular carcinoma                              | HBV DNA<1000 copies/ml HBsAg+ HBcAb+ HBeAb+     |
| 247255      | male   | 55  | Hepatocellular carcinoma                              | Chronic Hepatitis B history HBsAg+ HBcAb+       |
| 249868      | male   | 57  | Hepatocellular carcinoma                              | HBsAg+ HBcAb+ HBeAb+                            |
| 247845      | male   | 55  | Mixed hepatocellular carcinoma and cholangiocarcinoma | HBsAg+ HBcAb+ HBeAb+                            |
| 206208      | male   | 37  | Hepatocellular carcinoma                              | HBV DNA 14100 copies/ml HBsAg+ HBcAb+           |
| 257049      | male   | 45  | Mixed hepatocellular carcinoma and cholangiocarcinoma | HBV DNA 72300 copies/ml                         |
| 251637      | female | 45  | Hepatocellular carcinoma                              | HBV DNA 12200000 copies/ml                      |
| 247940      | female | 48  | Hepatocellular carcinoma                              | HBsAg+ HBcAb+ HBeAb+                            |
| 262535      | male   | 51  | Hepatocellular carcinoma                              | Chronic Hepatitis B history HBsAg+ HBcAb+       |
| 264373      | female | 67  | Hepatocellular carcinoma                              | HBV DNA<1000 copies/ml HBsAg+ HBcAb+ HBeAb+     |
| 263725      | female | 71  | Hepatocellular carcinoma                              | Chronic Hepatitis B history HBsAg+ HBcAb+       |
| 267244      | male   | 55  | Hepatocellular carcinoma                              | HBsAg+ HBcAb+ HBeAb+                            |
| 261029      | male   | 51  | Hepatocellular carcinoma                              | HBsAg+ HBcAb+ HBeAb+                            |
| 263725      | female | 71  | Hepatocellular carcinoma                              | HBV DNA 7410000 copies/ml HBsAg+ HBcAb+ HBeAb+  |
| 258231      | male   | 57  | Hepatocellular carcinoma                              | HBsAg+ HBcAb+ HBeAb+                            |
| 261610      | female | 50  | Hepatocellular carcinoma                              | HBsAg+ HBcAb+ HBeAb+                            |
| 276873      | male   | 46  | Hepatocellular carcinoma                              | HBV DNA<1000 copies/ml HBsAg+ HBcAb+ HBeAb+     |
| 281392      | male   | 42  | Hepatocellular carcinoma                              | HBV DNA 38100 copies/ml HBsAg+ HBcAb+ HBeAb+    |
| 281621      | female | 57  | Hepatocellular carcinoma                              | Chronic Hepatitis B history HBsAg+ HBcAb+       |
| 281691      | male   | 57  | Hepatocellular carcinoma                              | HBsAg+ HBcAb+ HBeAb+                            |
